# Supplementary material for: FTO Knockout Causes Chromosome Instability and G2/M Arrest in Mouse GC-1 Cells
Source: PubMed Central journal article supplement (PMC6348250; doi:10.3389/fgene.2018.00732), 2019-01-21
Supplement: Table_1.pdf [file Table_1.pdf]

## Supplementary materials

**Table S1. Oligo information**

| Oligo name | Sequences (5' - 3')                 |
|------------|-------------------------------------|
| Mad1-q-F   | AGCCGTCTGGAACAGGAAAAG               |
| Mad1-q-R   | GGGTTAAGGCTCATGTGTAGCA              |
| Mad2-q-F   | GTGGCCGAGTTTTTCTCATTG               |
| Mad2-q-R   | AGGTGAGTCCATATTTCTGCACT             |
| Bub1-q-F   | AGAATGCTCTGTCAGCTCATCT              |
| Bub1-q-R   | TGTCTTCACTAACCCACTGCT               |
| Cdc20-q-F  | TTCGTGTTTCGAGAGCGATTTG              |
| Cdc20-q-R  | ACCTTGGAAGTAGATTTGCCAG              |
| FTOres-F   | GAATCTAGAATGAAGCGCGTCCAGAC          |
| FTOres-R   | GGAGAATTCTGCTGGAAGCAAGATCCTAG       |
| ftoR313A-F | GCTGGCTCACAGCCTGCGTTTAGTTCCACTCACCG |
| ftoR313A-R | GCGTGAGTGGAAGTAAACGCAGGCTGTGAGCCAGC |
| BUB3-q-F   | GATGGCATCTCCTCGGTAAAG               |
| BUB3-q-R   | AATTGGCGGGCACATCGTAG                |
| CCNB1-q-F  | CTTGCAGTGAGTGACGTAGAC               |
| CCNB1-q-R  | CCAGTTGTTCGGAGATAAGCATAG            |
| CCNB2-q-F  | GCCAAGAGCCATGTGACTATC               |
| CCNB2-q-R  | CAGAGCTGGTACTTTGGTGTTTC             |
